# Supplementary material for: Reactivity of carbon dioxide in hydrofluoroethers: a facile access to cyclic carbonates
Source: Royal Society of Chemistry journal article supplement (doi:10.1039/c5cc03896k), 2015-01-01

## **Supporting Informations**

### **Reactivity of Carbon Dioxide in hydrofluoroethers:**

#### **Facile Access to Cyclic Carbonates**

Marius Mamone, Thierry Milcent, Benoit Crousse\*

Univ. Paris-Sud, BioCIS, CNRS, Faculté de Pharmacie, LabEx LERMIT  
5 Street J. B. Clément, Châtenay-Malabry 92296, France

# Experimental procedures

## 1. Reagents

Commercially available epoxides, solvents, were purchased from various commercial sources (Acros, Aldrich) and used without further purification. Carbon dioxide (purchased from carboxique carbopharm) was used without further purification or drying *prior to* its use.

TLC was performed on silica gel, 60F-250 (0.26mm thickness) plates. The plates were visualized with UV light (254 nm) or with a 3.5% solution of phosphomolybdic acid in ethanol or with a solution of  $\text{KMnO}_4$  in water. Flash chromatography (FC) was performed on Merck 60 silica gel (230 – 400 mesh). Melting points were determined on a Kofler melting point apparatus. NMR spectra were measured on an Ultrafield AVANCE300 ( $^1\text{H}$ , 300 MHz;  $^{13}\text{C}$ , 75 MHz) spectrometer. Unless otherwise stated, NMR data were obtained under ambient temperature conditions. Chemical shifts  $\delta$  are in ppm, and the following abbreviations are used: singlet (s), doublet (d), doublet doublet (dd), triplet (t), quintuplet (quint), multiplet (m) and broad singlet (brs).

The hydrofluoroethers HFE-7200 and HFE-7500 were provided by 3M, and their formulas are as follows:

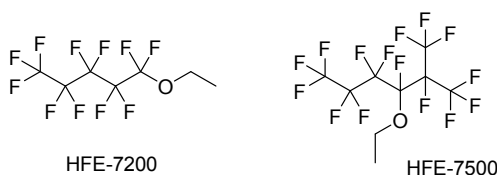

## 2. General procedure for the preparation of cyclic carbonates:

*Under 1 atm of  $\text{CO}_2$ :*  $\text{CO}_2$  from a gas balloon was allowed to react with epoxide (1 mmol), TBAI (5 mol%) in 2 mL of HFE-7500 according to the reported time in the Table 2, under vigorous stirring.

*Under 5 bar:* A 30 mL stainless steel autoclave was charged with the epoxide precursor (1 mmol), the catalyst TBAI (5mol%), and HFE-7500 (2 mL). The autoclave was placed under pressure of  $\text{CO}_2$  (5 bar). The autoclave was sealed and heated according to the reported time in the Table 3.

*Purification :* After addition of 4 mL of methanol, HFE-7500 was separated of the organic phase.

The HFE-7500 could be also removed by simple distillation (bp: 129°C) from the carbonate.

In the case of solid products, a simple filtration was required to remove and recover the HFE-7500.

Then the products were purified by flash chromatography on silica gel (cyclohexane/EtOAc: 7/3).

**4-Phenoxymethyl-1,3-dioxolan-2-one (2a)**<sup>1</sup>. White solid; mp 99–100°C (lit.<sup>1</sup> 98–100°C);  $^1\text{H}$  NMR ( $\text{CDCl}_3$ , 300 MHz):  $\delta$  7.31 (2H, t,  $J = 7.6$  Hz, Ar-H), 7.02 (1H, t,  $J = 7.2$  Hz, Ar-H), 6.91 (2H, d,  $J = 8.0$  Hz, Ar-H), 5.00 (1H, m, OCH), 4.61 (1H, dd,  $J = 8.4$  and 5.4 Hz,  $\text{OCH}_2$ ),

4.54 (1H, dd,  $J = 8.4$  and  $8.4$  Hz, OCH<sub>2</sub>), 4.26-4.13 (2H, m, OCH<sub>2</sub>). <sup>13</sup>C NMR (CDCl<sub>3</sub>, 75 MHz):  $\delta$  157.7, 154.7, 129.6, 121.8, 114.5, 74.2, 66.8, 66.0.

**4-Bromomethyl-1,3-dioxolan-2-one (2b)<sup>2</sup>**: colourless oil. <sup>1</sup>H NMR (300 MHz, CDCl<sub>3</sub>):  $\delta$  4.94 (1H, m), 4.55 (1H, t,  $J = 8.0$  Hz), 4.29 (1H, m), 3.63-3.51 (2H, m); <sup>13</sup>C NMR (75 MHz, CDCl<sub>3</sub>):  $\delta$  (ppm) 154.2, 73.9, 68.0, 31.9.

**4-Allyloxymethyl-1,3-dioxan-2-one (2c)<sup>1</sup>**. colourless oil. <sup>1</sup>H NMR (CDCl<sub>3</sub>, 300 MHz):  $\delta$  5.80 (1H, m, CH=CH<sub>2</sub>), 5.22 (1H, m, CH=CH<sub>2</sub>), 5.15 (1H, m, CH=CH<sub>2</sub>), 4.80 (1H, m, OCH), 4.46 (1H, t,  $J = 8.3$  Hz, OCH<sub>2</sub>), 4.33 (1H, dd,  $J = 8.3$  and  $6.0$  Hz, OCH<sub>2</sub>), 4.00 (2H, m, OCH<sub>2</sub>), 3.65 (1H, dd,  $J = 11.1$  and  $3.5$  Hz), 3.55 (1H, dd,  $J = 11.1$  and  $3.7$  Hz). <sup>13</sup>C NMR (CDCl<sub>3</sub>, 75 MHz):  $\delta$  154.9, 133.6, 117.5, 75.0, 72.3, 68.7, 66.1.

**4-Phenyl-1,3-dioxolan-2-one (2d)<sup>1</sup>**. White solid; mp : 66-67°C (lit.<sup>1</sup> 68-69°C); <sup>1</sup>H NMR (CDCl<sub>3</sub>, 300 MHz):  $\delta$  7.44-7.41 (3H, m, Ar-H), 7.39-7.31 (2H, m, Ar-H), 5.65 (1H, t,  $J = 8.0$  Hz, OCH), 4.8 (1H, t,  $J = 8.4$  Hz, OCH<sub>2</sub>), 4.30 (1H, t,  $J = 8.2$  Hz, OCH<sub>2</sub>). <sup>13</sup>C NMR (CDCl<sub>3</sub>, 75 MHz):  $\delta$  154.7, 135.7, 129.4, 129.0, 125.7, 77.8, 71.0.

**4-Chloromethyl-1,3-dioxolan-2-one (2e)<sup>1</sup>**. colourless liquid. <sup>1</sup>H NMR (CDCl<sub>3</sub>, 300 MHz):  $\delta$  4.97- 4.95 (1H, m, OCH), 4.58 (1H, dd,  $J = 8.9$  and  $8.6$  Hz, OCH<sub>2</sub>), 4.42 (1H, dd,  $J = 5.7$  and  $8.9$  Hz, OCH<sub>2</sub>), 3.81-3.68 (2H, m, ClCH<sub>2</sub>). <sup>13</sup>C NMR (CDCl<sub>3</sub>, 75 MHz):  $\delta$  154.2, 74.3, 66.8, 43.8.

**4-Naphthyl-1-oxymethyl-1,3-dioxolan-2-one (2f)** : white solid; mp : 136-138°C; <sup>1</sup>H NMR (300 MHz, DMSO-d<sub>6</sub>):  $\delta$  8.09 (1H, m), 7.89 (1H, m), 7.57-7.50 (3H, m), 7.43 (1H, t,  $J = 7.8$  Hz), 7.00 (1H, d,  $J = 7.6$  Hz), 5.30 (1H, m, CHO), 4.73 (1H, t,  $J = 8.5$  Hz), 4.58 (1H, dd,  $J = 8.5$  and  $5.2$  Hz), 4.48 (1H, dd,  $J = 11.10$  and  $2.3$  Hz), 4.39 (1H, dd,  $J = 11.10$  and  $3.6$  Hz). <sup>13</sup>C NMR (75 MHz, DMSO-d<sub>6</sub>):  $\delta$  155.0, 153.2, 133.9, 127.4, 126.5, 126.0, 125.5, 124.6, 121.0, 120.6, 105.4, 74.7, 67.7, 66.3. Elemental Analysis C<sub>14</sub>H<sub>12</sub>O<sub>4</sub> (244.24) : calculated :C, 68.85; H, 4.95; O, 26.20; found C, 68.90; H, 4.91; O, 26.05.

**4-n-Nonyl-1,3-dioxolan-2-one (2g)**. colourless liquid. <sup>1</sup>H NMR (CDCl<sub>3</sub>, 300 MHz):  $\delta$  4.68 (1H, m, OCH), 4.50 (1H, t,  $J = 8.3$  Hz, OCH<sub>2</sub>), 4.04 (1H, dd,  $J = 8.3$  and  $7.2$  Hz, OCH<sub>2</sub>), 1.85-1.6 (2H, m, CH<sub>2</sub>), 1.50-1.16 (4H, m, CH<sub>2</sub>CH<sub>2</sub>), 0.86 (3H, t,  $J = 7.0$  Hz, CH<sub>3</sub>). <sup>13</sup>C NMR (CDCl<sub>3</sub>, 75 MHz):  $\delta$  154.9, 76.9, 69.1, 33.1, 26.1, 21.9, 13.4. Elemental Analysis: C<sub>13</sub>H<sub>24</sub>O<sub>3</sub> (228.17) : calculated C, 68.38; H, 10.59; O, 21.02; found C, 68.25; H, 10.62; O, 20.89.

**4-Methyl-1,3-dioxolan-2-one (2h)<sup>2</sup>**: pale yellow oil. <sup>1</sup>H NMR (300 MHz, CDCl<sub>3</sub>):  $\delta$  4.85-4.93 (1H, m), 1.50 (3H, d,  $J = 6.4$  Hz), 4.54 (1H, t,  $J = 8.0$  Hz), 4.03 (1H, t,  $J = 8.0$  Hz); <sup>13</sup>C NMR (75 MHz, CDCl<sub>3</sub>):  $\delta$  154.9, 73.4, 70.4, 18.9.

**4-n-Butyl-1,3-dioxolan-2-one (2i)<sup>1</sup>**: pale yellow oil. <sup>1</sup>H NMR (CDCl<sub>3</sub>, 300 MHz):  $\delta$  4.60 (1H, m, OCH), 4.44 (1H, t,  $J = 8.1$  Hz, OCH<sub>2</sub>), 3.95 (1H, t,  $J = 8.1$  Hz, OCH<sub>2</sub>), 1.8-1.5 (2H, m, CH<sub>2</sub>), 1.40-1.22 (4H, m, CH<sub>2</sub>CH<sub>2</sub>), 0.85 (3H, t,  $J = 6.8$  Hz, CH<sub>3</sub>). <sup>13</sup>C NMR (CDCl<sub>3</sub>, 75 MHz):  $\delta$  154.9, 76.9, 69.1, 33.1, 26.1, 21.9, 13.4.

## References :

1. J. Qin, P. Wang, Q. Li, Y. Zhang, D. Yuan and Y. Yao *Chem. Commun.* **2014**, 50, 10952.

2. W. Chen, L.-x. Zhong, X.-w. Peng, R.-c. Sun, F.-c. Lu *ACS Sustainable Chem. Eng.*, **2015**, *3* (1), 147–152.

**Table.** Information describing qualitatively the appearance of the systems formed when 1 mM of epoxide and 5% of catalyst mixed with 2 mL of HFE 7500.

| Epoxide   | State of matter of <b>1a-i</b> | System of 1mM epoxide/<br>5% catalyst/2mL solvent | Temperature |
|-----------|--------------------------------|---------------------------------------------------|-------------|
| <b>1a</b> | Liquid                         | two phase (L/L)                                   | rt          |
| <b>1a</b> | Liquid                         | two phase (L/L)                                   | 80°C        |
| <b>1b</b> | Liquid                         | two phase (L/L)                                   | rt          |
| <b>1b</b> | Liquid                         | two phase (L/L)                                   | 80°C        |
| <b>1c</b> | Liquid                         | two phase (L/L)                                   | rt          |
| <b>1c</b> | Liquid                         | two phase (L/L)                                   | 80°C        |
| <b>1d</b> | Liquid                         | two phase (L/L)                                   | rt          |
| <b>1d</b> | Liquid                         | two phase (L/L)                                   | 80°C        |
| <b>1e</b> | Liquid                         | two phase (L/L)                                   | 80°C        |
| <b>1f</b> | Liquid                         | two phase (L/L)                                   | 80°C        |
| <b>1g</b> | Liquid                         | two phase (L/L)                                   | 80°C        |
| <b>1h</b> | Liquid                         | two phase (L/L)                                   | 80°C        |
| <b>1i</b> | Liquid                         | two phase (L/L)                                   | 80°C        |

#### 4. Copies of $^1\text{H}$ and $^{13}\text{C}$ NMR data for the Carbonate compounds :

##### Compound 2a:

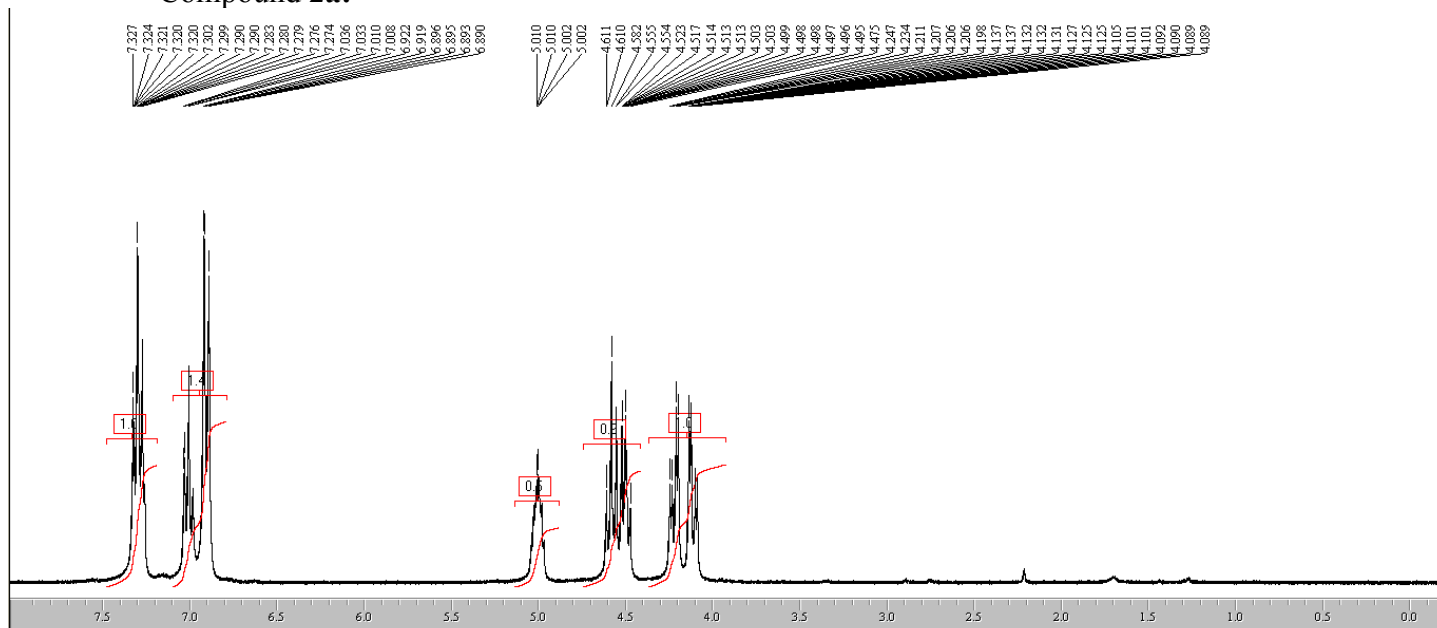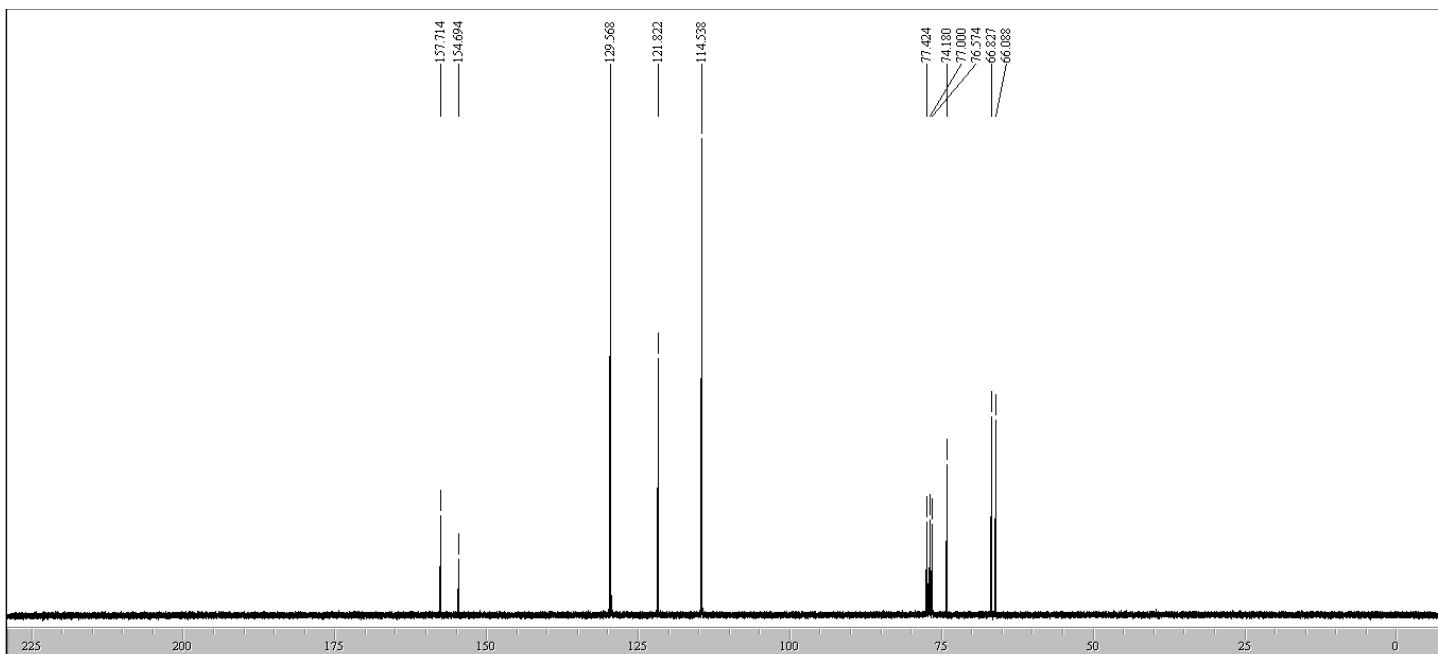

Compound **2b**:

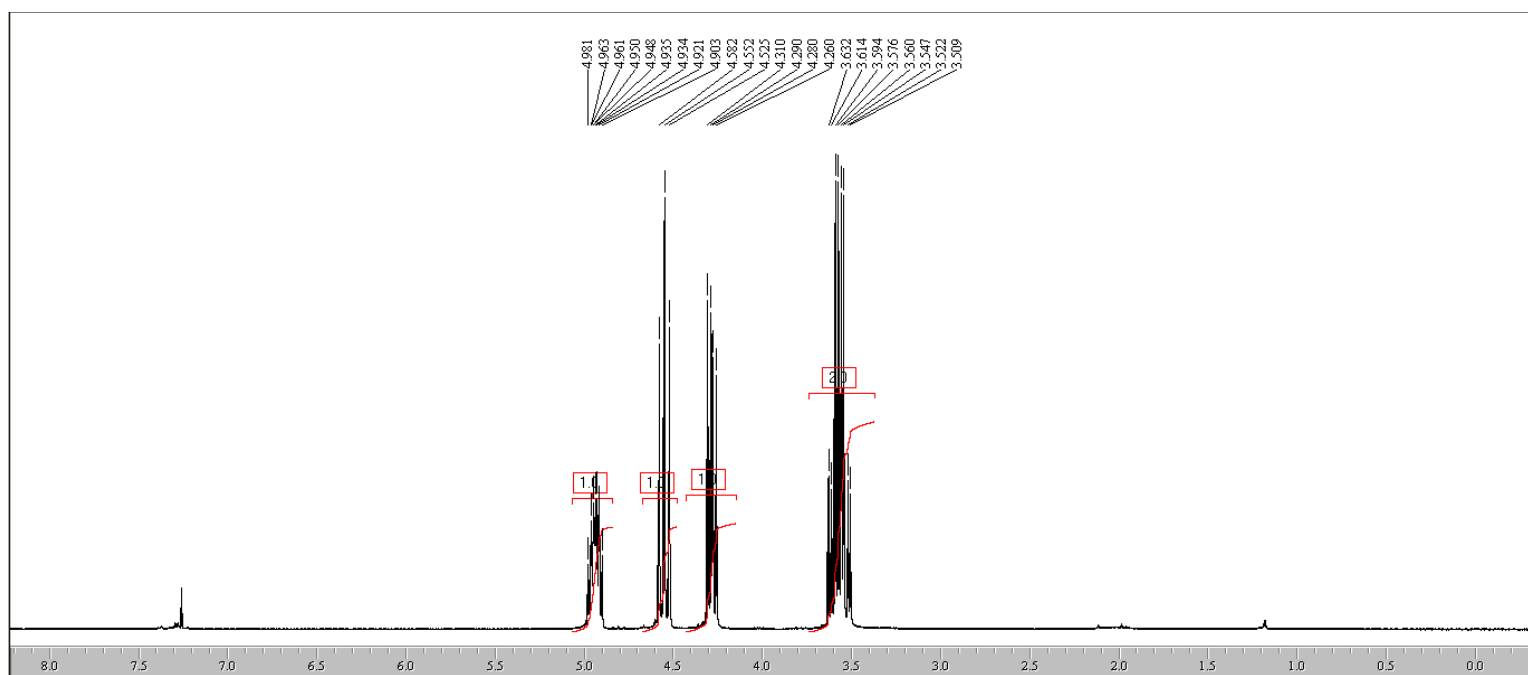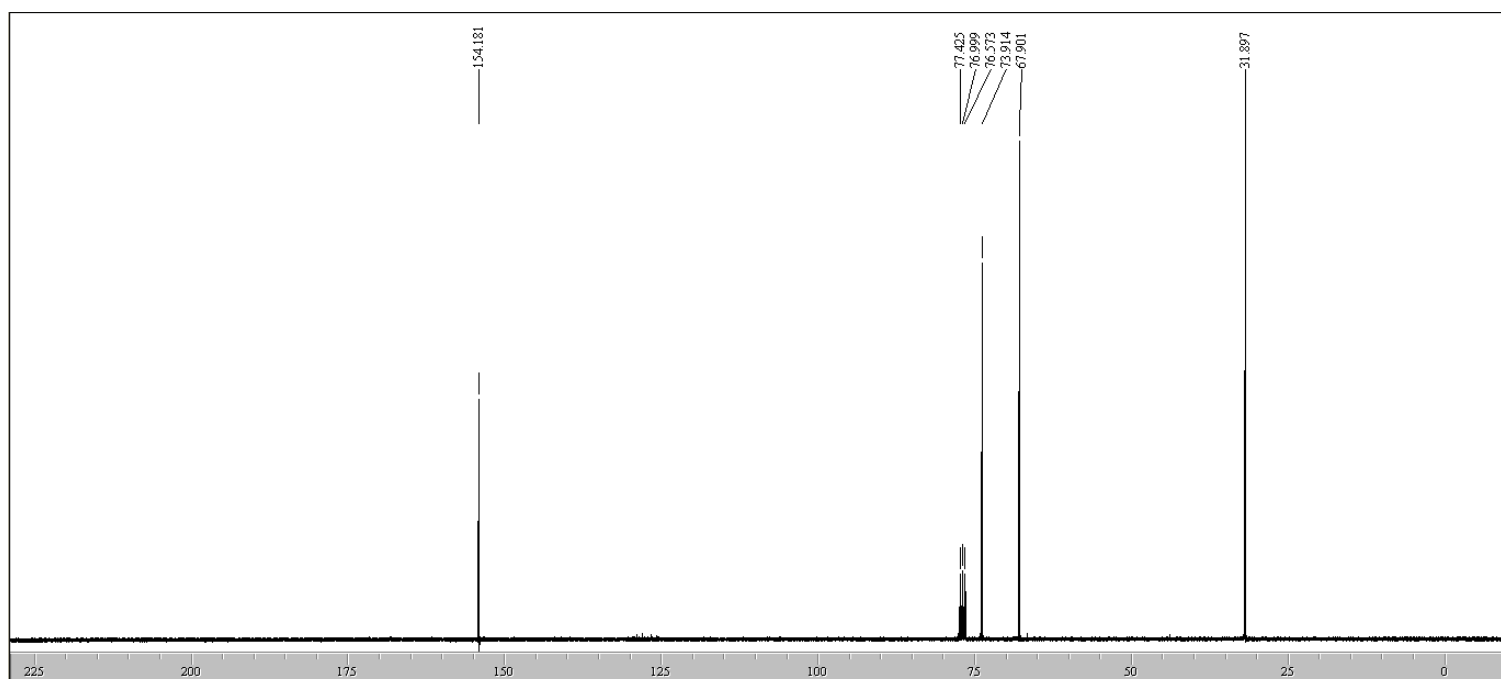

# Compound 2c:

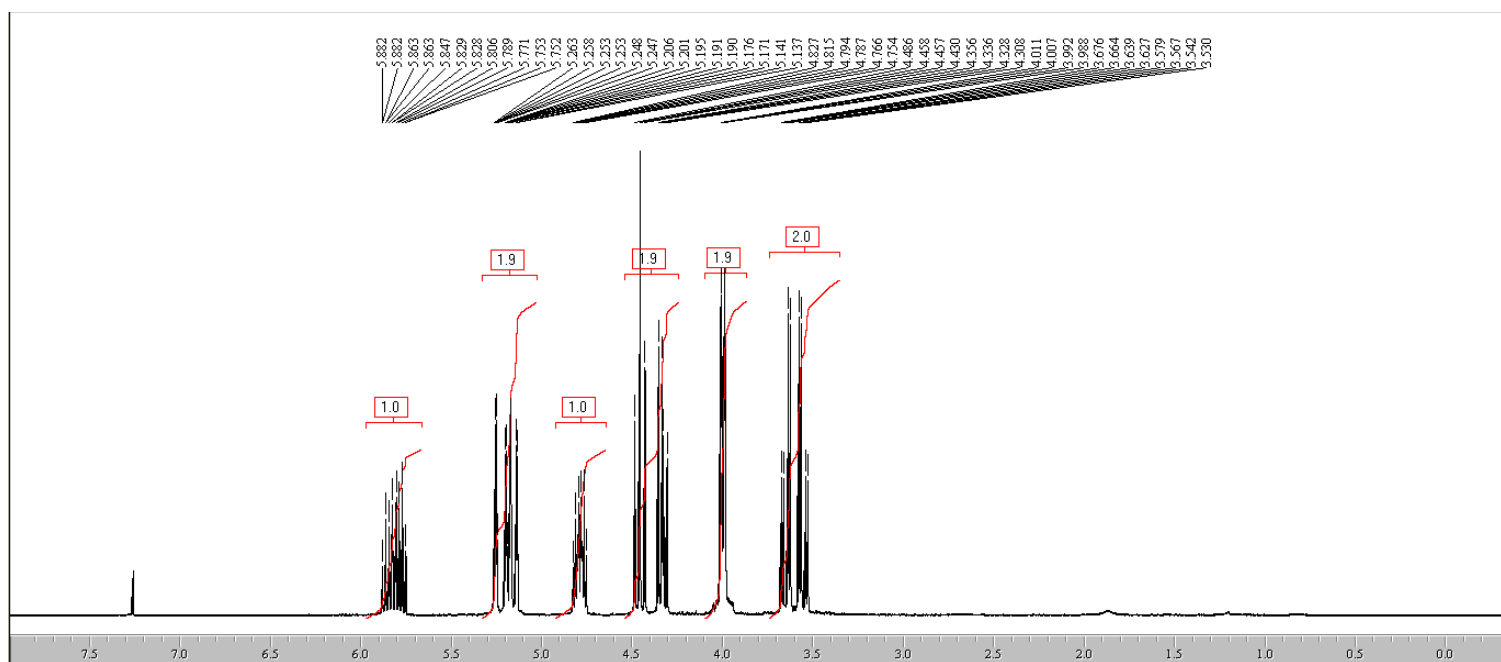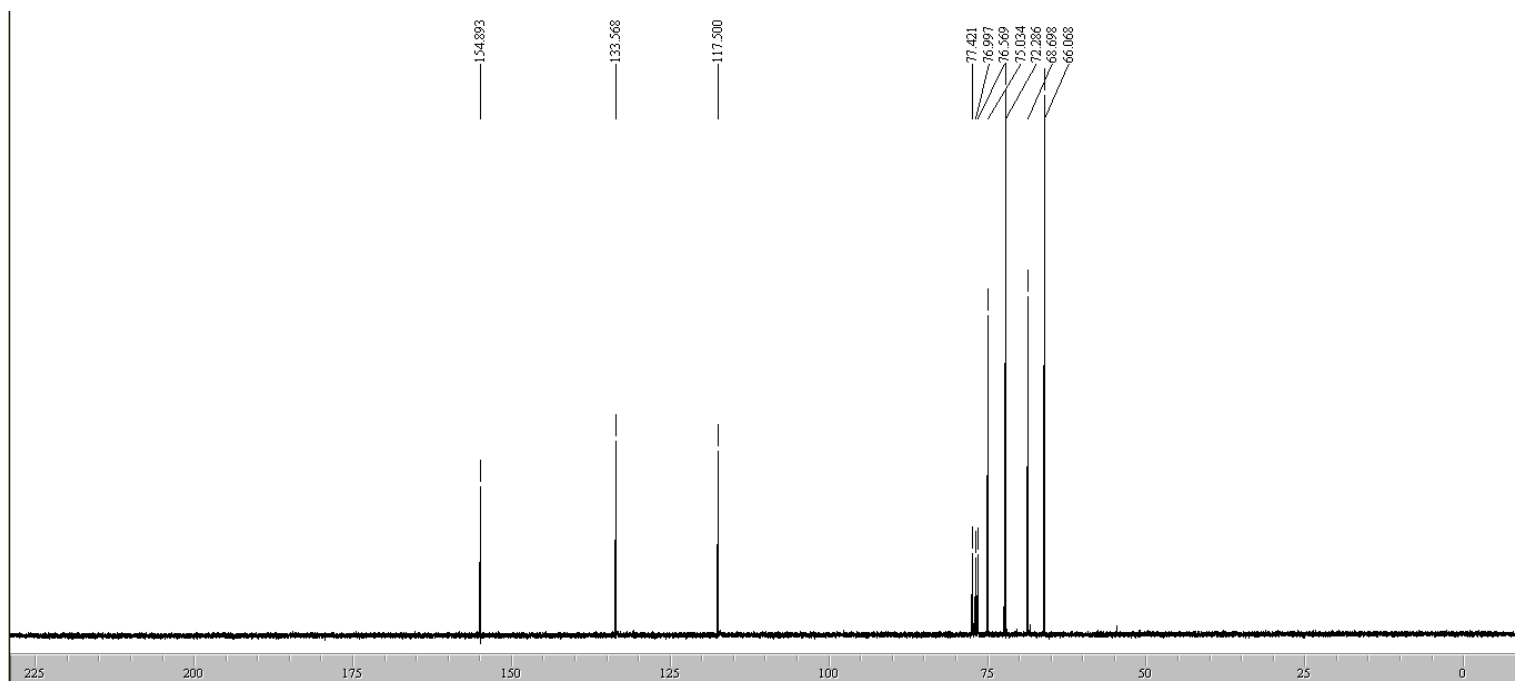

# Compound 2d:

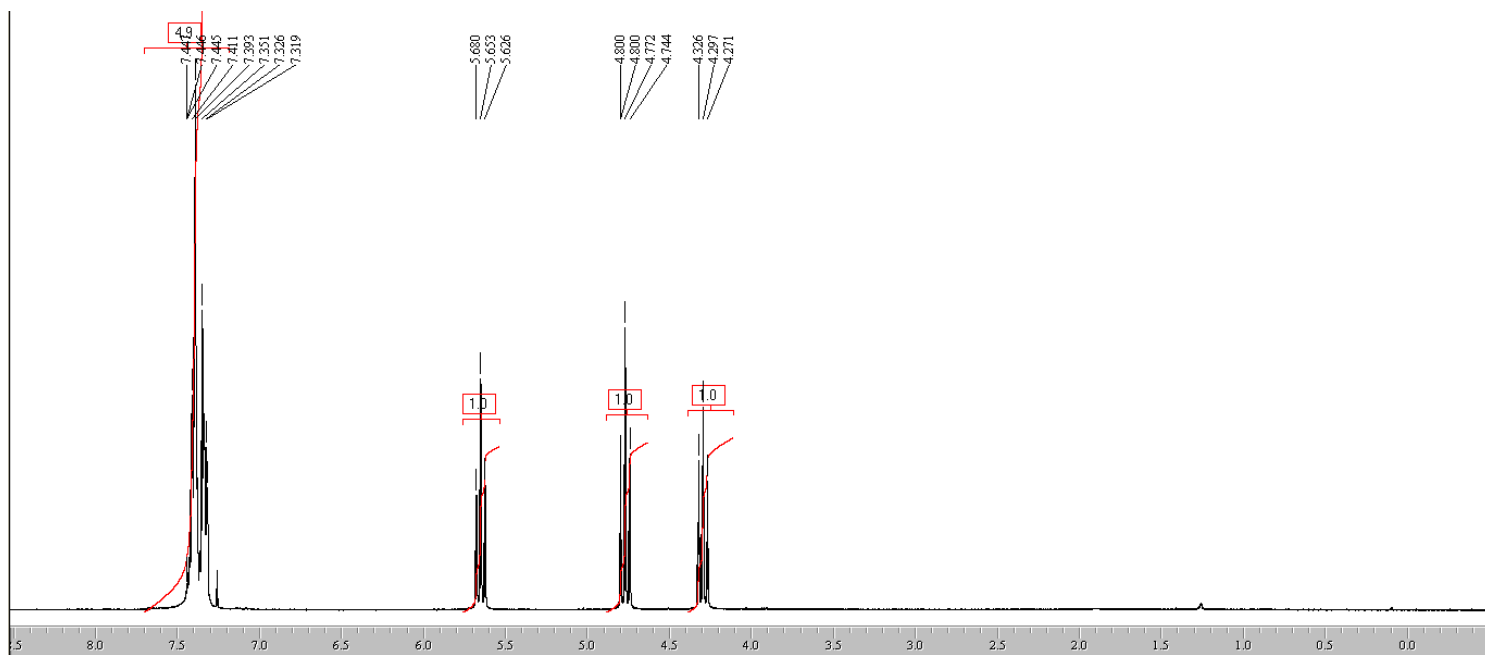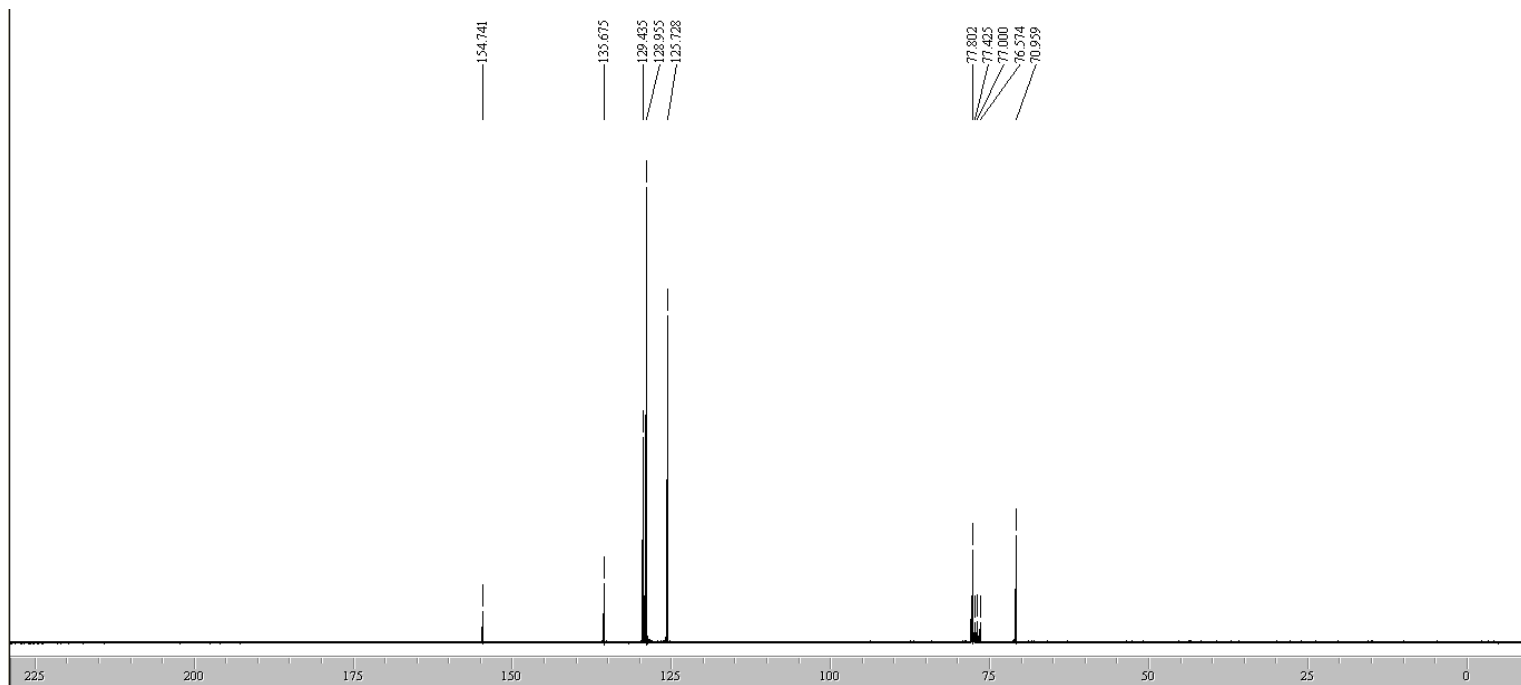



# Compound 2e:

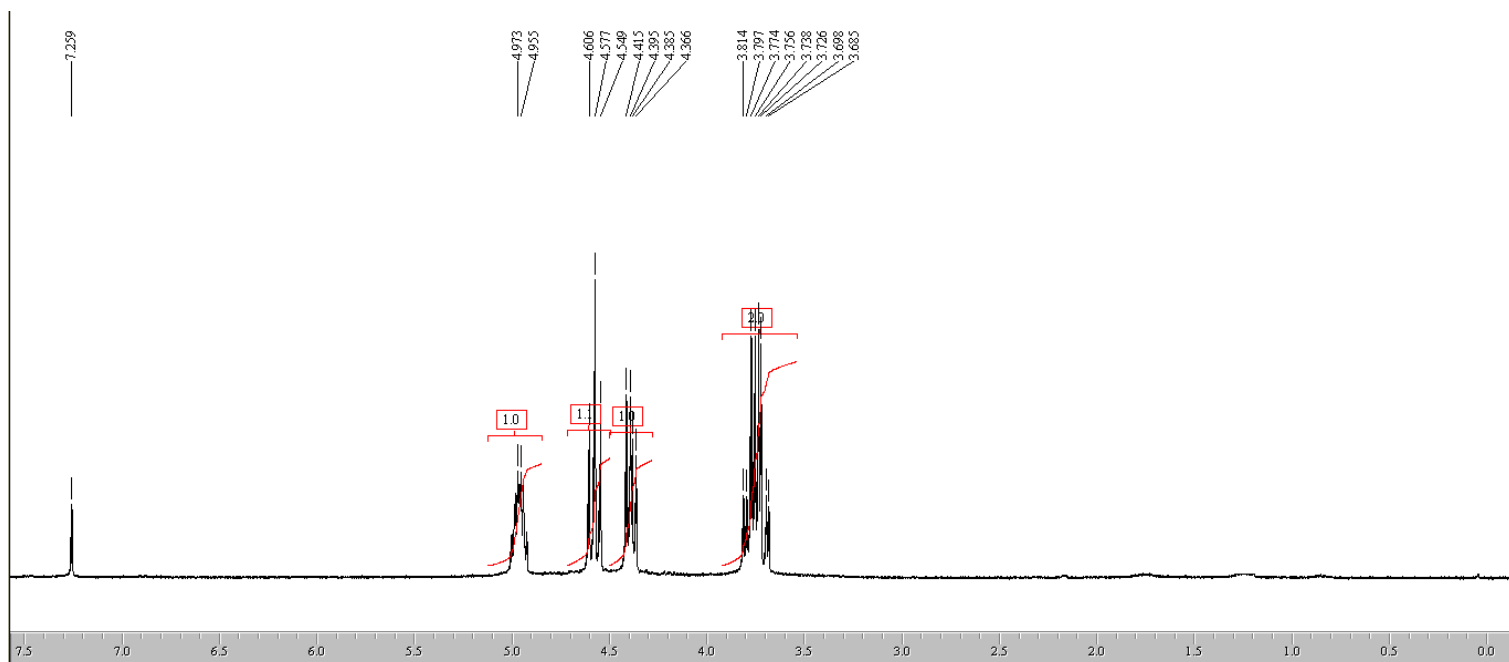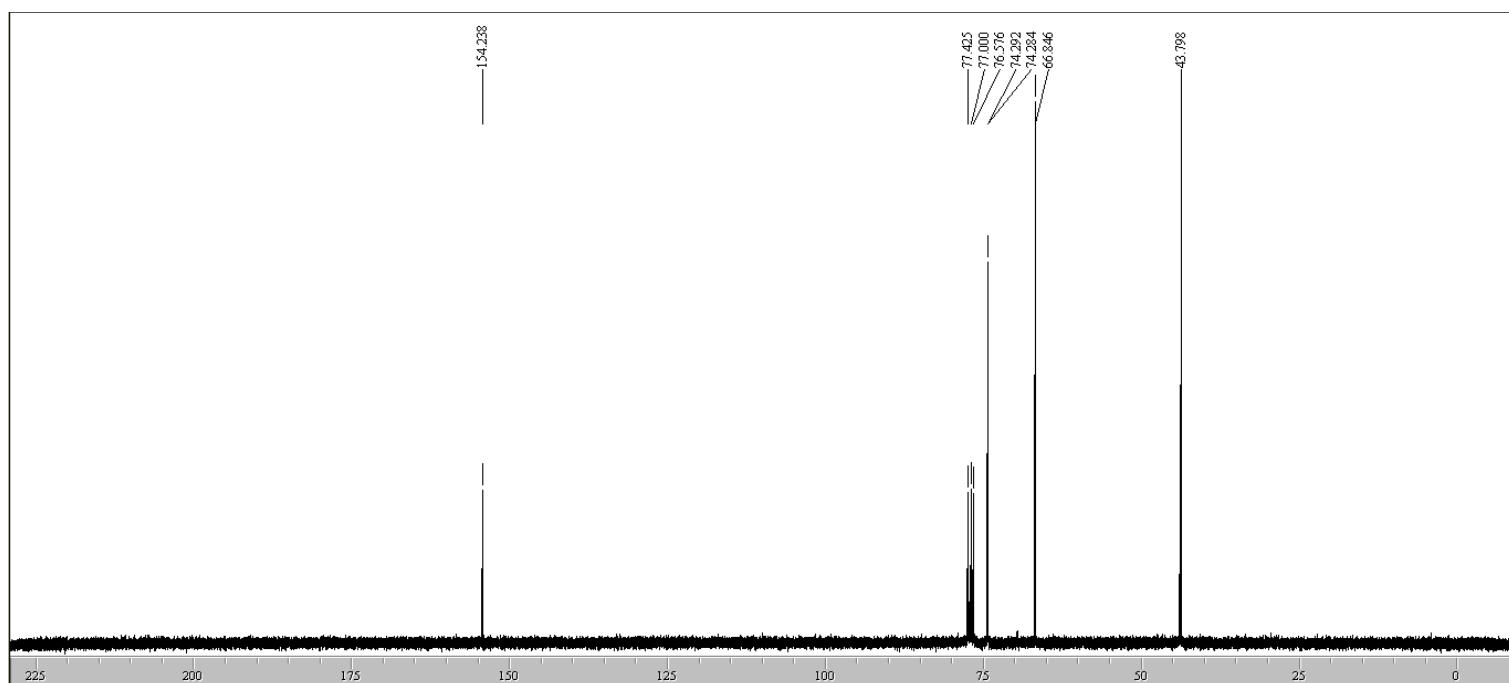

# Compound 2f:

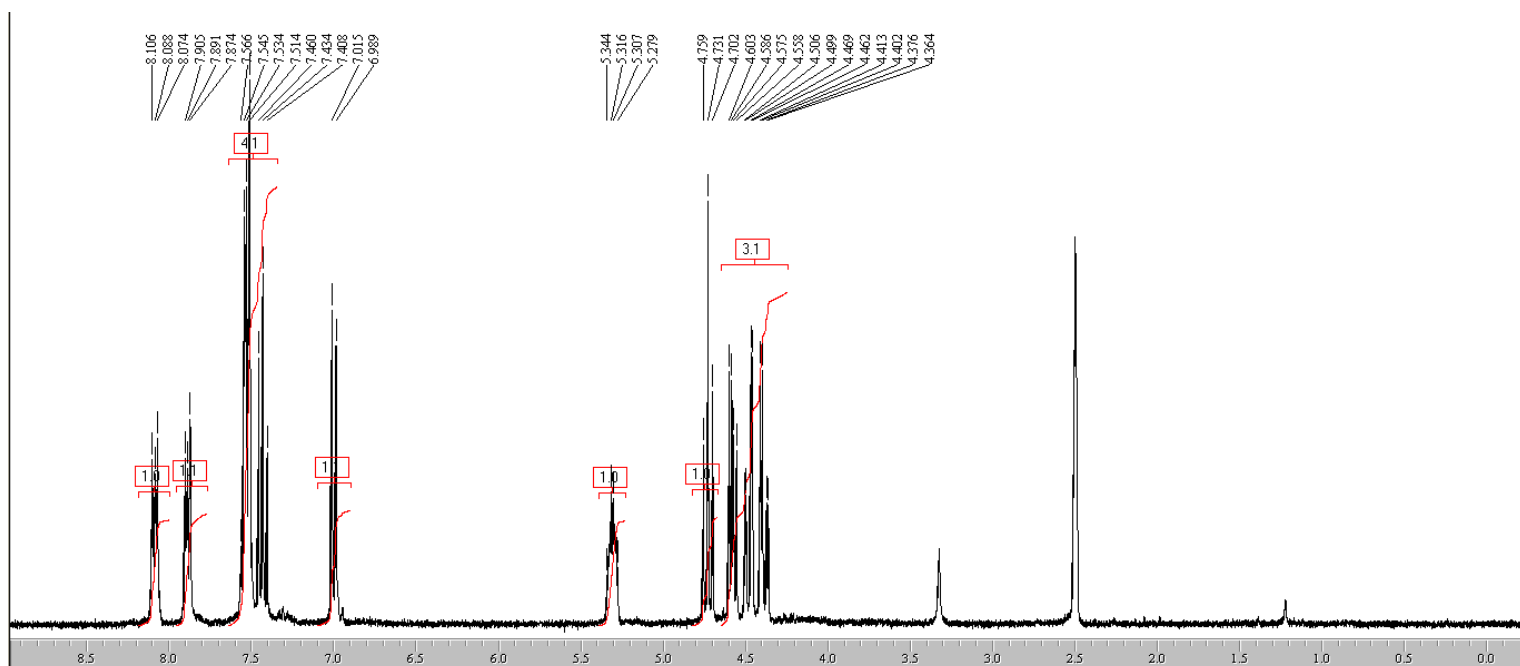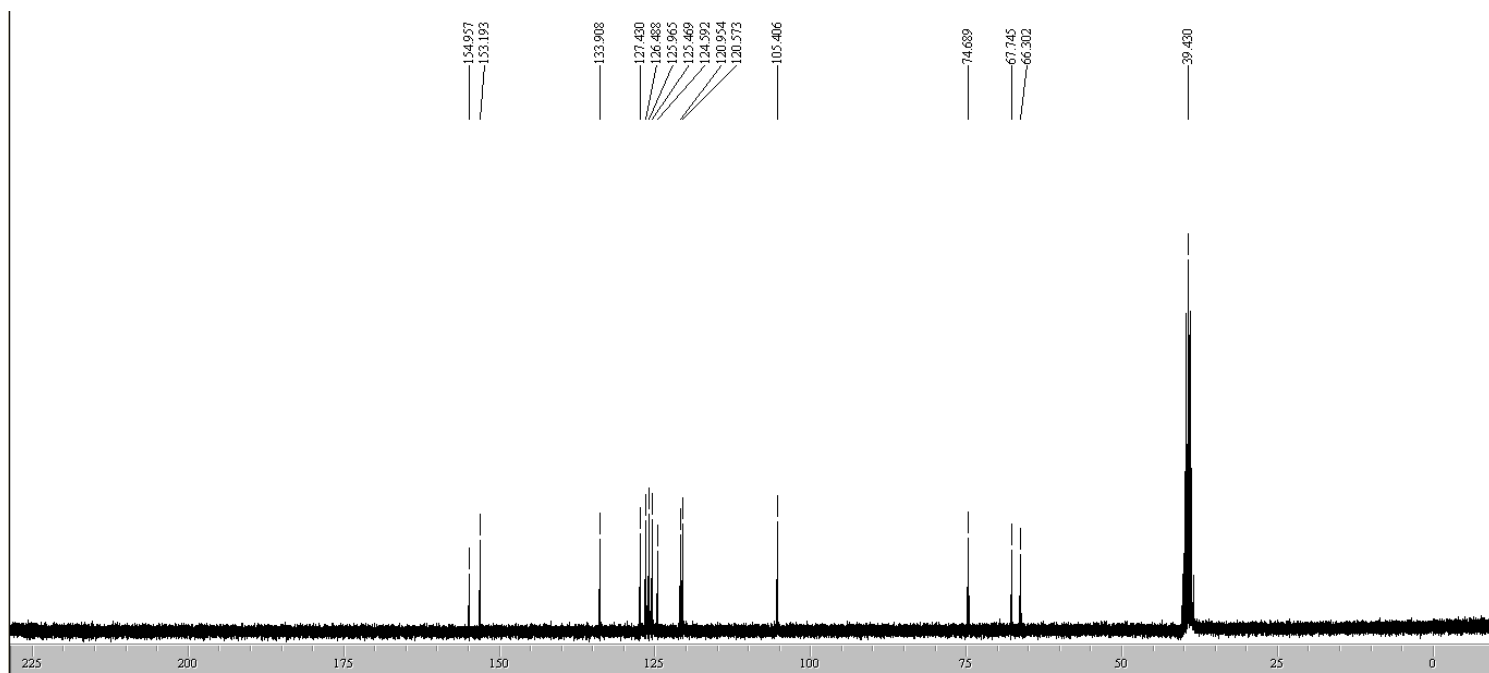



Compound **2h**:

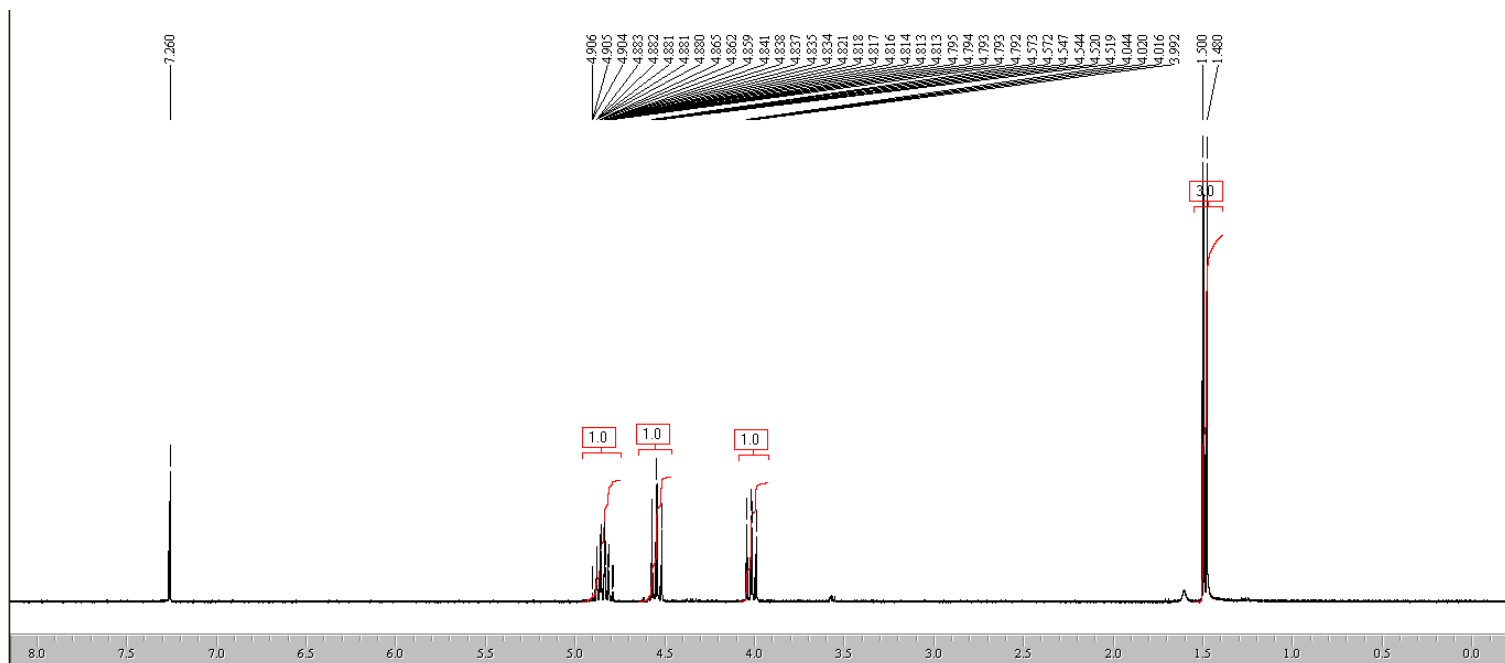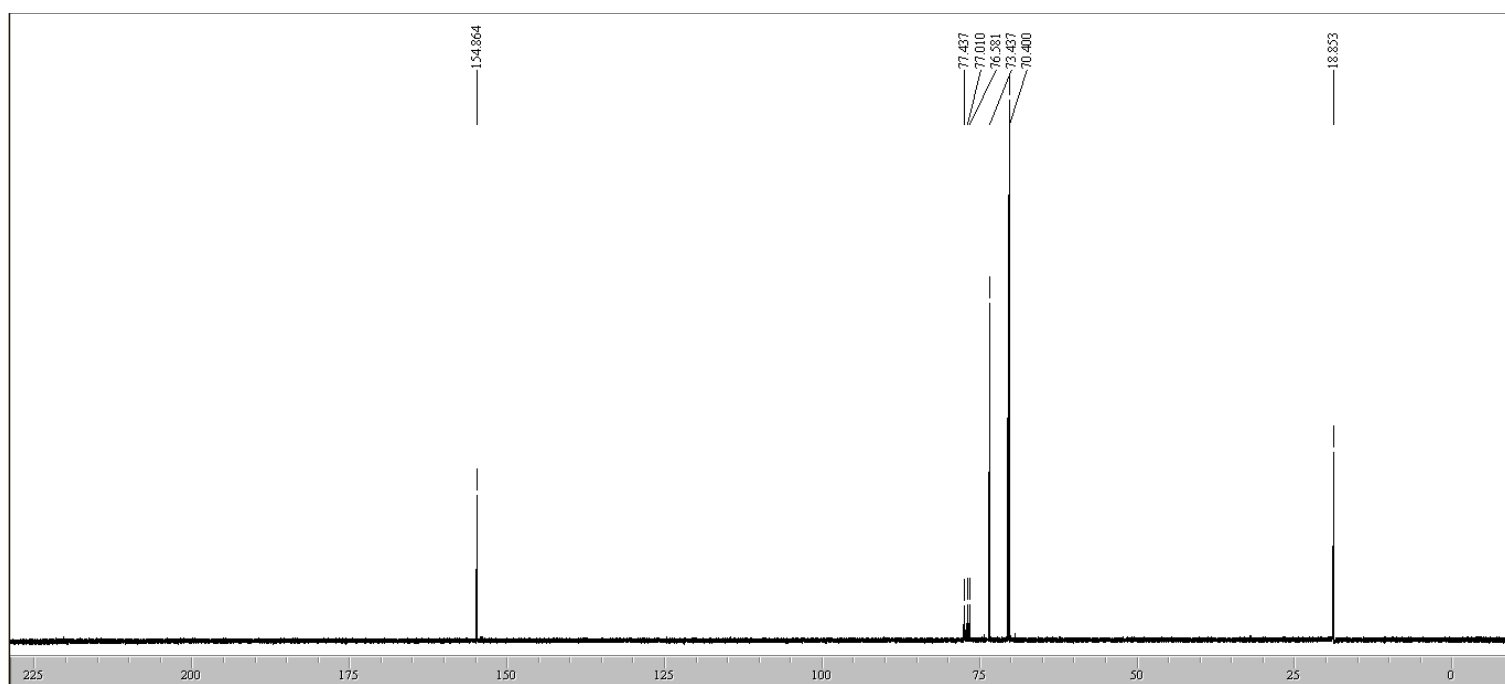

# Compound 2i:

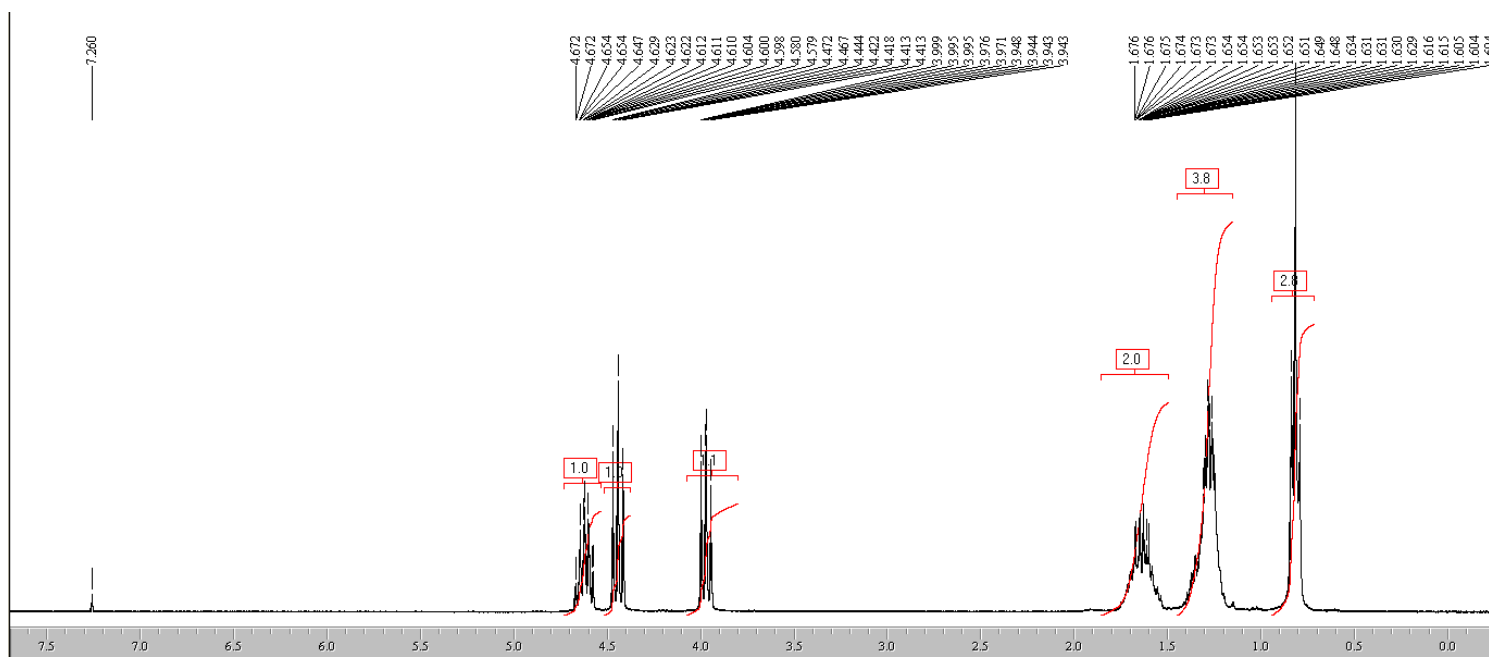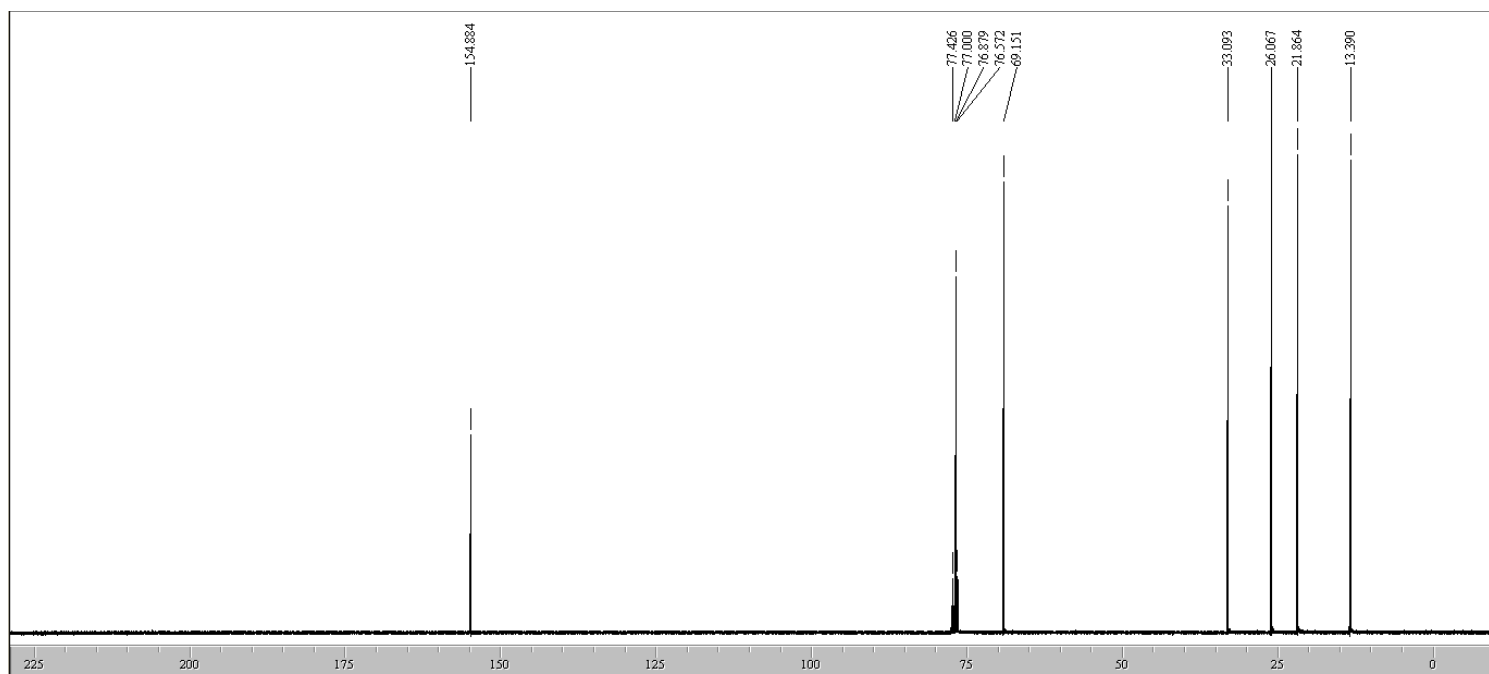

Supplement: c5cc03896k1.pdf [file c5cc03896k1.pdf]
